# Supplementary material
Source: PubMed Central journal article supplement (PMC2827954)
Supplement: JCI40283sd.pdf [file JCI40283sd.pdf]

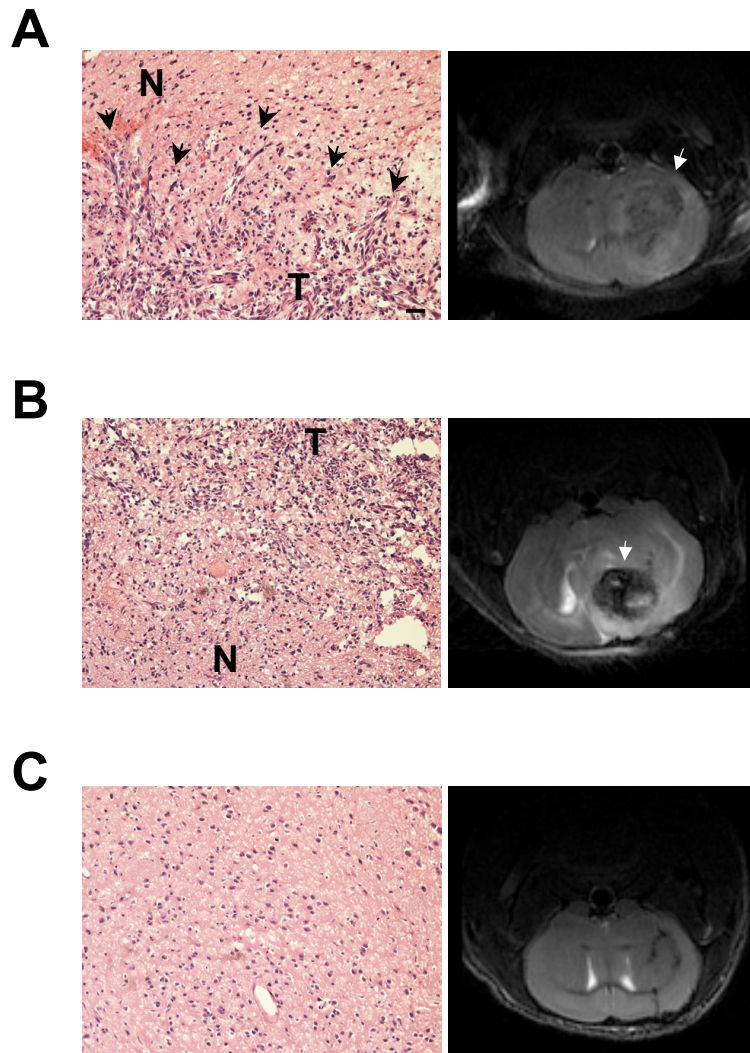

**Supplemental Figure 1. Histology and MRI images of brain. A,** U251 i.c. tumor in control group diffusively invades in the brain (left, arrows). Tumor was confirmed at the right brain on day 40 in control group (right, arrow). **B,** U251 tumor two weeks after 15 Gy of irradiation (left), and MRI images of tumor in the brain 52 days after irradiation (right, arrow). **C,** representative images of brain after treatment of irradiation and SDF-1 inhibition. U251 i.c. tumor is not shown in H&E stain (left). MRI images of brain 52 days after irradiation. Bar; 50  $\mu$ m.

**A**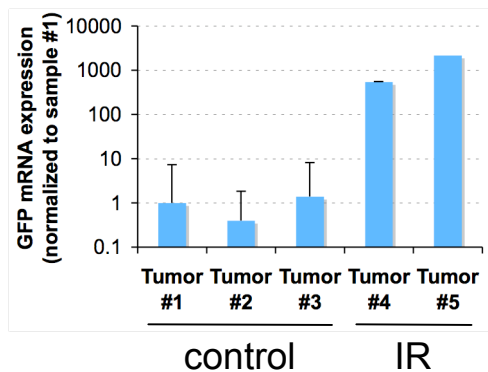**B**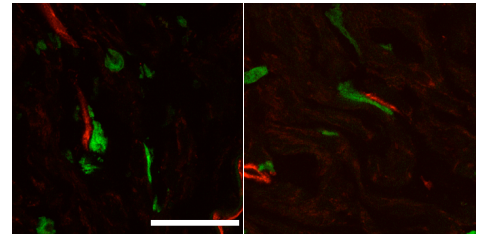**C**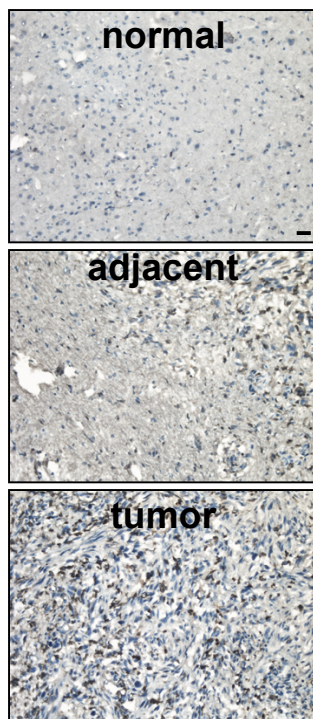**D**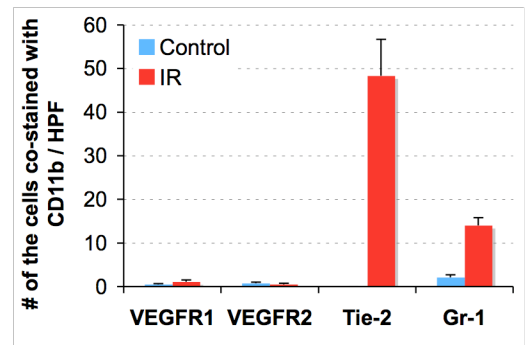**E**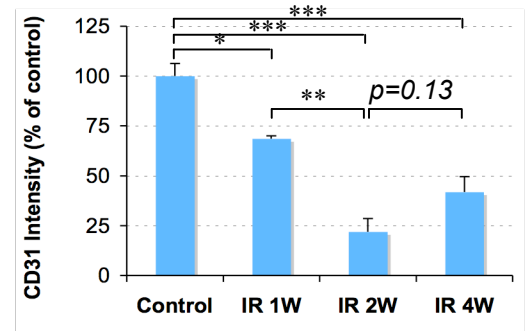

**Supplemental Figure 2.** **A**, quantitative analysis for mRNA expression of GFP-BMDCs in tumor-bearing brain before and after irradiation. **B**, confocal microscopic analysis. Red (CD31) and Green (GFP-BM) are associated but not co-localized. **C**, immunohistochemistry of CD11b<sup>+</sup> cells in normal, adjacent normal, or tumor sections 2 weeks following 15 Gy. **D**, characterization of infiltrating CD11b<sup>+</sup> cells into tumor before and after irradiation. Quantitation of positive staining for CD11b and other markers including VEGFR1, VEGFR2, Tie-2, or Gr-1 by immunohistochemistry. **E**, quantification of CD31<sup>+</sup> endothelial cells in the tumors following irradiation. \*p<0.05, \*\*p<0.01, \*\*\*p<0.001. Bar; 50  $\mu$ m.

**A**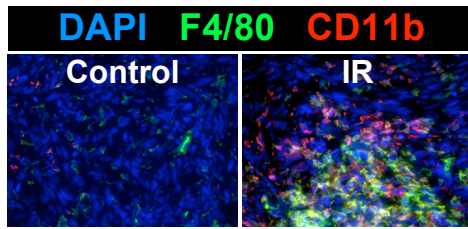**B**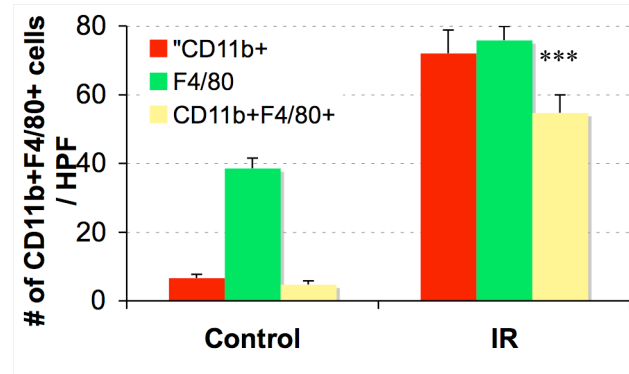

**Supplemental Figure 3. A**, IHC staining for F4/80 (green), CD11b (red), and DAPI (blue) in U251 i.c. tumors. **B**, quantification of CD11b and F4/80+ cells in the irradiated tumor of (A). \*\*\* $p < 0.001$  (*versus* control).

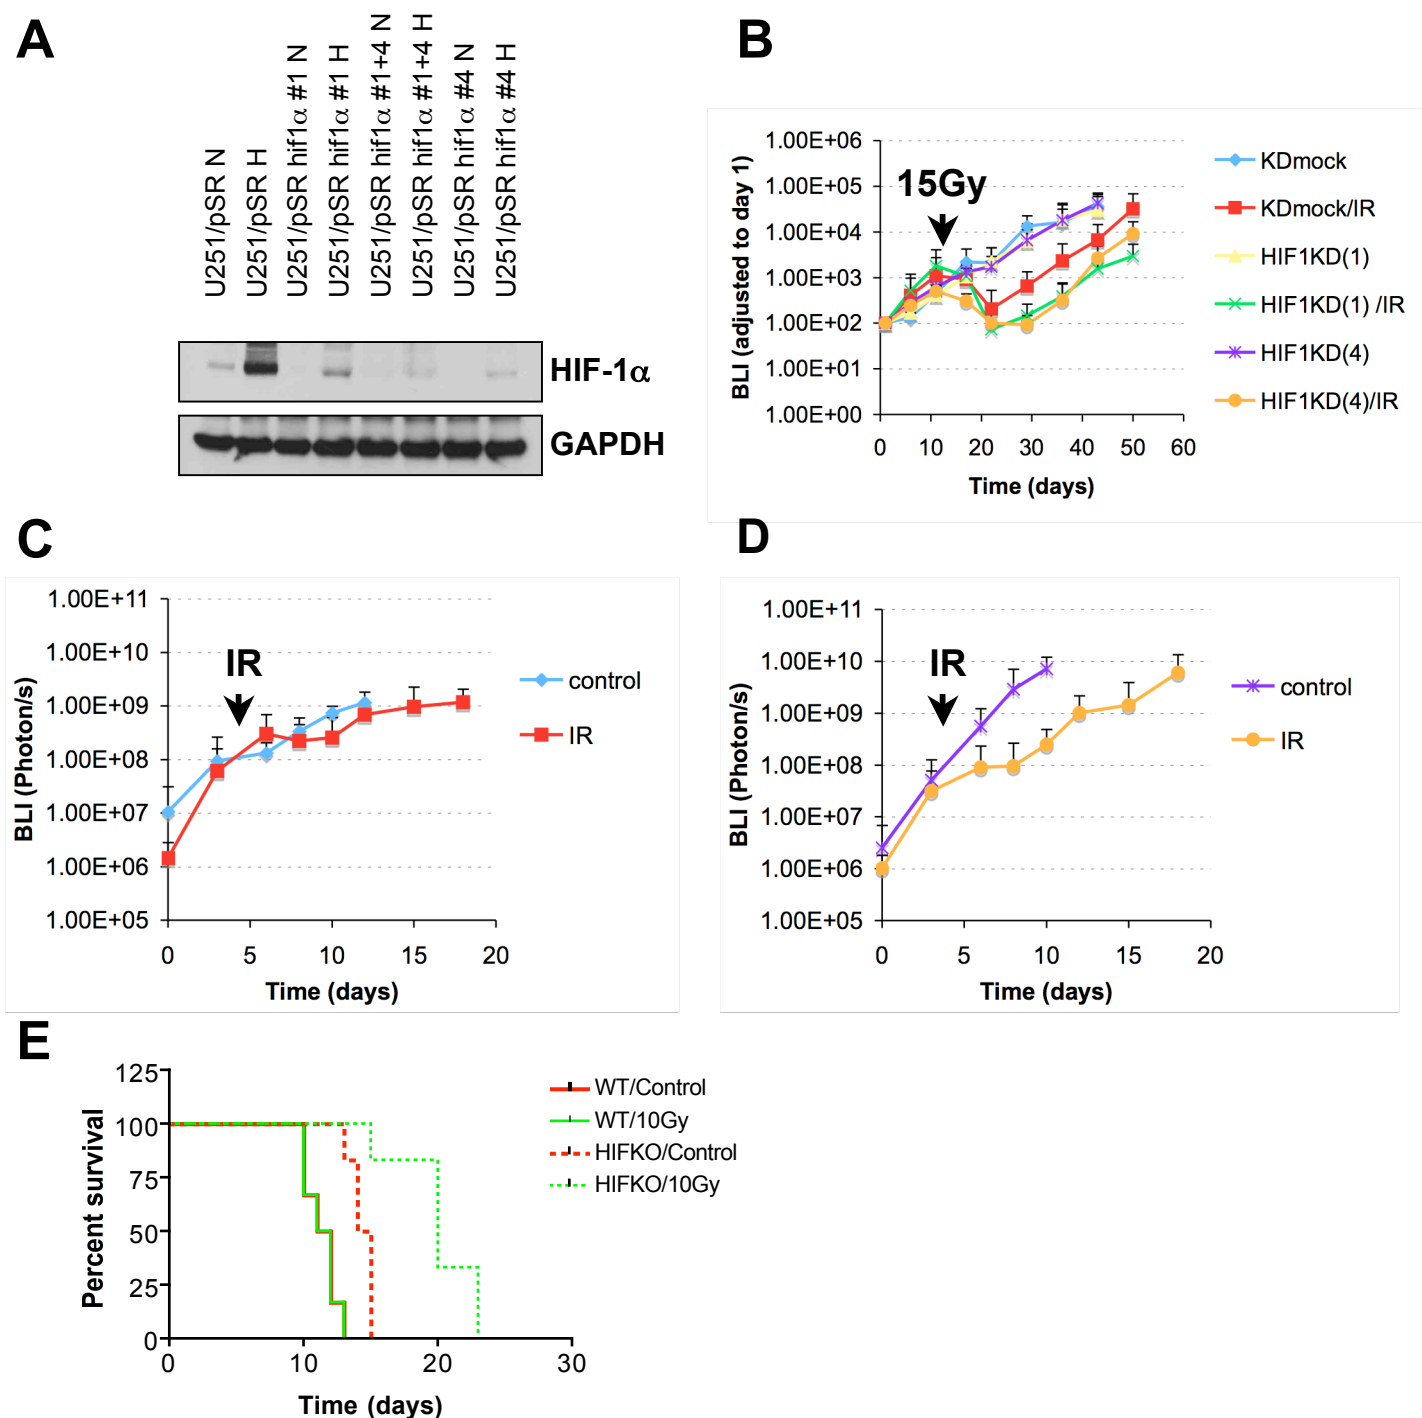

**Supplemental Figure 4.** **A**, Western blot analysis for HIF-1 $\alpha$  expression in WT, vector only (pSR), specific shRNA for HIF-1 $\alpha$ - (clone #1, #4, and #1+4) transduced U251 cells. GAPDH was used as the internal control. **B**, growth curve of orthotopic pFB-Luc U251/pSR and U251 HIF1KD<sub>1</sub> and HIF1KD<sub>4</sub> tumors. Single dose (15 Gy) of irradiation on day 13 was performed. Tumor growth was measured by BLI. Growth curve of i.c. pFB-Luc murine HIF-1 wild type (**C**) and HIF-1 KO (**D**) GBM tumors. **E**, Kaplan-Meier survival curve of murine GBM/HIF-1 wt and KO tumor-bearing mice. Mice were treated with 10 Gy of irradiation on day 8.

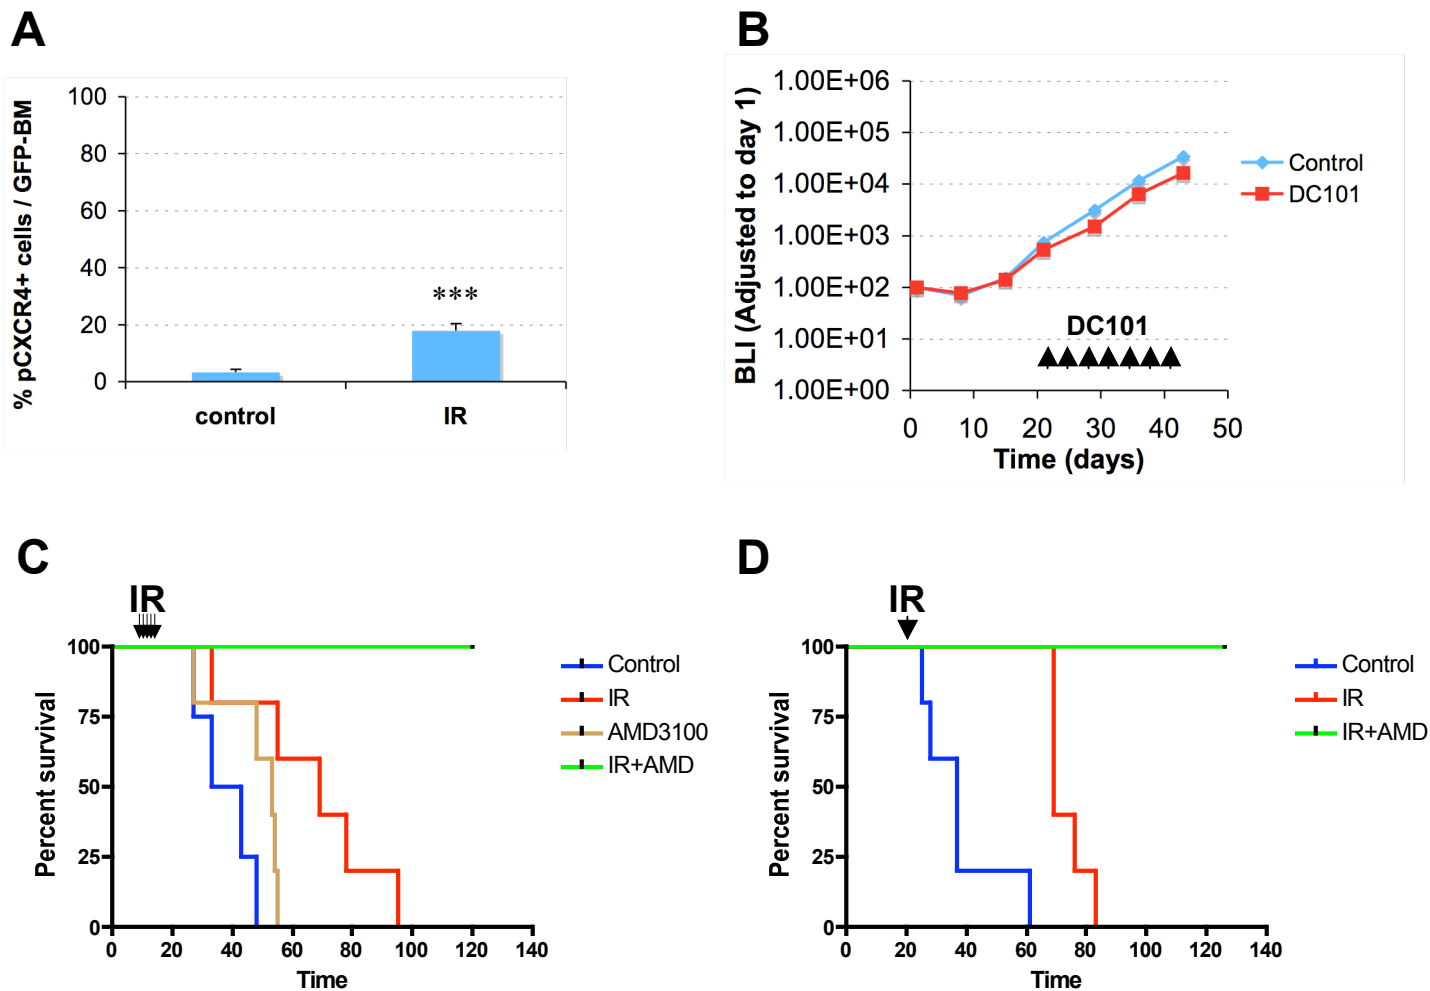

**Supplemental Figure 5.** **A**, quantification of pCXCR4 GFP-BM cells in U251 i.c. tumor following irradiation. \*\*\* $p < 0.001$ . **B**, growth curve of pFB-Luc U251 i.c. tumor. Mice were treated with DC101 on day 21 for 3 weeks. **C**, Kaplan-Meier survival curve of U251 i.c. tumor-bearing mice of Figure 4A and B. **D**, survival curve of mice in Figure 4C.

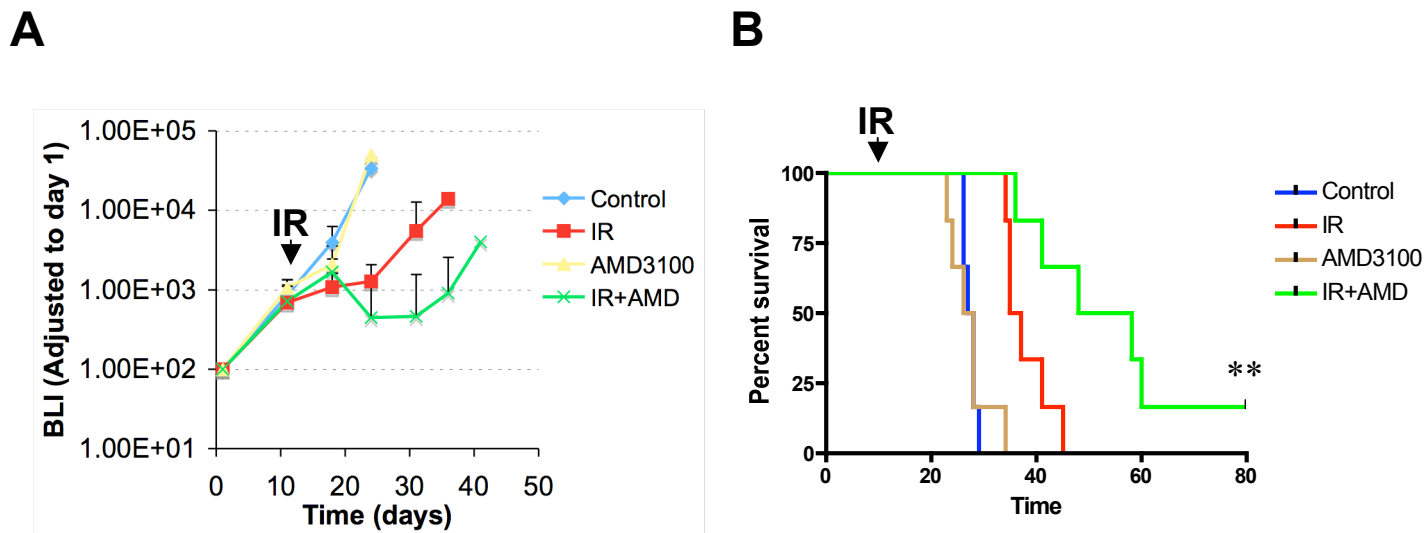

**Supplemental Figure 6. A**, growth curve of pFB-Luc U87 i.c. tumor. Mice were treated with or without 15 Gy irradiation on day 11, AMD3100 alone, or irradiation followed by AMD3100 (n=6). Error indicates S.D. **B**, Kaplan-Meier survival curve of **(A)**. \*\*p<0.01 versus IR.

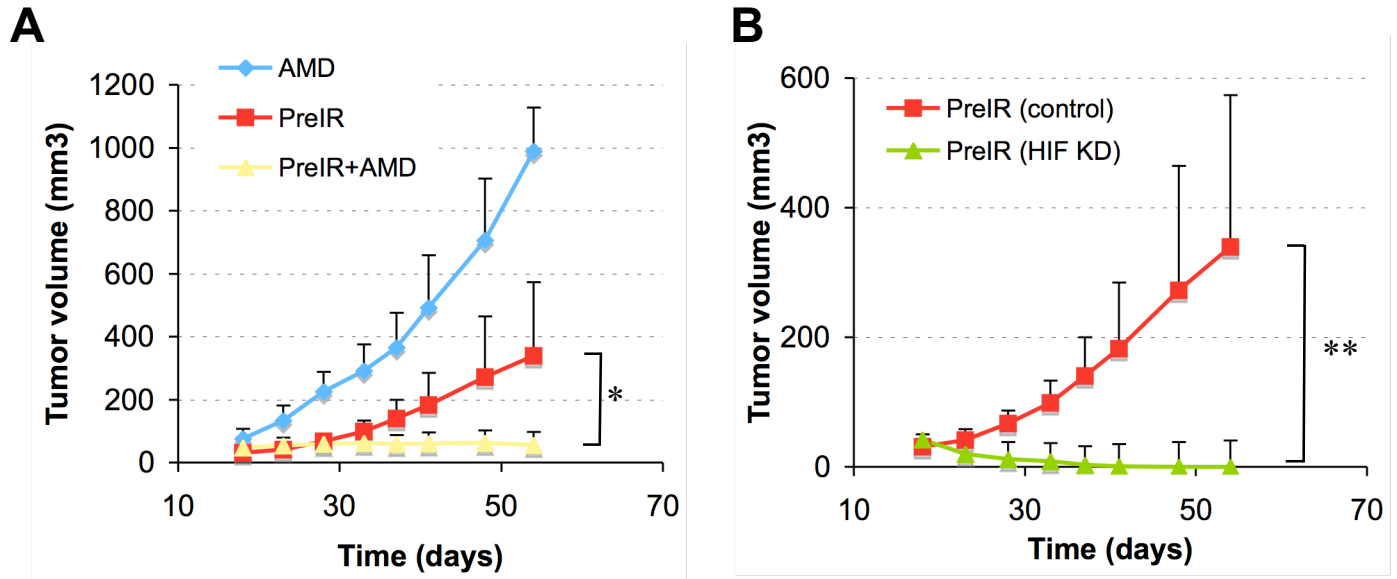

**Supplemental Figure 7. A**, growth curve of U251 s.c. tumor. Tumor cells were inoculated at non-irradiated site with AMD3100 infusion (blue), at pre-irradiated site with (yellow) or without (red) AMD3100. **B**, growth curve of U251 s.c. HIF1 pSR vector only (control) and HIF1KD<sub>1+4</sub> tumor. Tumor cells were inoculated at pre-irradiated site. Error indicates S.D.

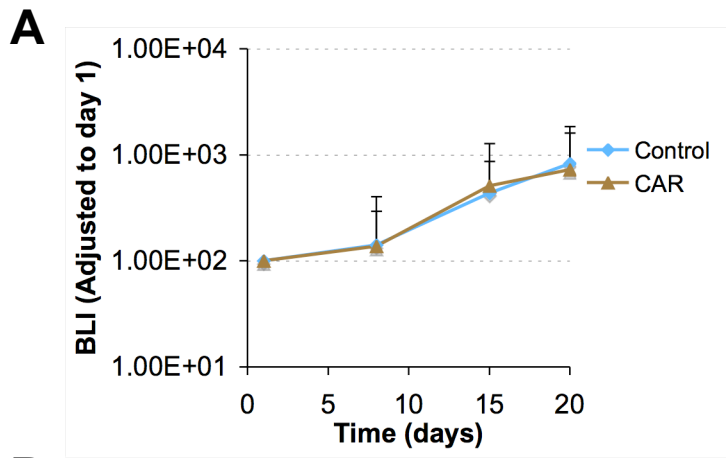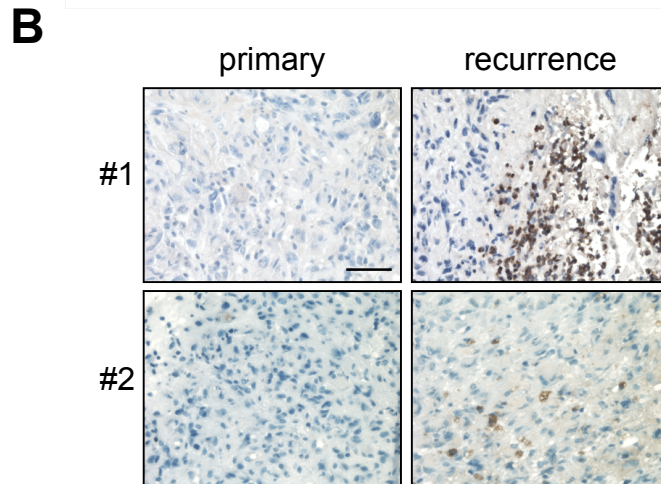

**Supplemental Figure 8. A**, growth curve of pFB-Luc U25 1i.c. tumor. Carrageenan (CAR) treatment was started 9 days before tumor inoculation. **B**, IHC of GBM clinical samples staining for CD11b with higher magnification. Bar; 50  $\mu$ m.
